# Supplementary material for: Multi-omics analysis reveals the association between elevated KIF18B expression and unfavorable prognosis, immune evasion, and regulatory T cell activation in nasopharyngeal carcinoma
Source: Front Immunol. 2023 Sep 8;14:1258344. doi: 10.3389/fimmu.2023.1258344 (PMC10514916; doi:10.3389/fimmu.2023.1258344)
Supplement: Supplementary file 2 [file Table_1.xlsx]

## Sheet: Sheet1
Supplementary Materials for Tables
Multi-omics analysis reveals the association between elevated KIF18B expression and unfavorable prognosis, immune evasion, and regulatory T cell activation in nasopharyngeal carcinoma
Supplementary Table S1. Baseline information of GSE12452 dataset
ID	Group	KIF18B_expression_levels
GSM312896	Normal	7.25387
GSM312897	Normal	7.10817
GSM312898	Normal	7.16353
GSM312899	Normal	4.93355
GSM312900	Normal	6.55818
GSM312901	Normal	5.76206
GSM312902	Normal	6.98884
GSM312903	Normal	6.94878
GSM312904	Normal	7.63381
GSM312905	Normal	6.0578
GSM312906	Tumor	8.6089
GSM312907	Tumor	7.47961
GSM312908	Tumor	8.80123
GSM312909	Tumor	8.819
GSM312910	Tumor	8.00435
GSM312911	Tumor	7.58554
GSM312912	Tumor	7.76235
GSM312913	Tumor	7.50622
GSM312914	Tumor	8.25857
GSM312915	Tumor	7.64431
GSM312916	Tumor	7.76235
GSM312917	Tumor	8.18047
GSM312918	Tumor	8.42985
GSM312919	Tumor	8.22982
GSM312920	Tumor	7.92109
GSM312921	Tumor	9.0548
GSM312922	Tumor	8.39235
GSM312923	Tumor	7.62903
GSM312924	Tumor	8.93484
GSM312925	Tumor	7.87815
GSM312926	Tumor	7.29964
GSM312927	Tumor	7.43777
GSM312928	Tumor	8.49992
GSM312929	Tumor	8.43064
GSM312930	Tumor	7.81096
GSM312931	Tumor	9.15139
GSM312932	Tumor	8.3224
GSM312933	Tumor	6.92558
GSM312934	Tumor	8.47892
GSM312935	Tumor	7.5244
GSM312936	Tumor	7.37707
