# Supplementary material for: Multi-omics analysis reveals the association between elevated KIF18B expression and unfavorable prognosis, immune evasion, and regulatory T cell activation in nasopharyngeal carcinoma
Source: Front Immunol. 2023 Sep 8;14:1258344. doi: 10.3389/fimmu.2023.1258344 (PMC10514916; doi:10.3389/fimmu.2023.1258344)
Supplement: Supplementary file 3 [file Table_2.xlsx]

## Sheet: Sheet1
Supplementary Materials for Tables
Multi-omics analysis reveals the association between elevated KIF18B expression and unfavorable prognosis, immune evasion, and regulatory T cell activation in nasopharyngeal carcinoma
Supplementary Table S2. Baseline information of GSE53819 dataset
ID	Group	KIF18B_expression_levels
GSM1301462	Normal	9.84579
GSM1301463	Normal	9.90074
GSM1301464	Normal	8.65654
GSM1301465	Normal	9.54776
GSM1301466	Normal	7.86316
GSM1301467	Normal	11.0691
GSM1301468	Normal	10.6829
GSM1301469	Normal	3.49237
GSM1301470	Normal	10.2047
GSM1301471	Normal	9.44284
GSM1301472	Normal	9.44311
GSM1301473	Normal	10.2682
GSM1301474	Normal	9.01454
GSM1301475	Normal	7.713
GSM1301476	Normal	8.25306
GSM1301477	Normal	8.71665
GSM1301478	Normal	11.2648
GSM1301479	Normal	9.45105
GSM1301444	Tumor	10.4837
GSM1301445	Tumor	10.9644
GSM1301446	Tumor	10.7769
GSM1301447	Tumor	10.7746
GSM1301448	Tumor	9.93144
GSM1301449	Tumor	9.56798
GSM1301450	Tumor	10.2098
GSM1301451	Tumor	10.4444
GSM1301452	Tumor	10.0035
GSM1301453	Tumor	11.5936
GSM1301454	Tumor	10.7982
GSM1301455	Tumor	10.7405
GSM1301456	Tumor	9.0205
GSM1301457	Tumor	9.68376
GSM1301458	Tumor	11.2022
GSM1301459	Tumor	10.8883
GSM1301460	Tumor	10.5638
GSM1301461	Tumor	10.4741
