# Supplementary material for: Multi-omics analysis reveals the association between elevated KIF18B expression and unfavorable prognosis, immune evasion, and regulatory T cell activation in nasopharyngeal carcinoma
Source: Front Immunol. 2023 Sep 8;14:1258344. doi: 10.3389/fimmu.2023.1258344 (PMC10514916; doi:10.3389/fimmu.2023.1258344)
Supplement: Supplementary file 4 [file Table_3.xlsx]

## Sheet: Sheet1
Supplementary Materials for Tables
Multi-omics analysis reveals the association between elevated KIF18B expression and unfavorable prognosis, immune evasion, and regulatory T cell activation in nasopharyngeal carcinoma
Supplementary Table S3. Baseline information of GSE102349 dataset
ID	Followup_time	PFSstatus	Stage	stromal_tils	intratumoral_tils	Morphologic subtype	non-synonymous_mutation_burden	KIF18B_expression_levels
NPC0001PT00264T00264	30.2	0	NA	65	35	Undifferentiated, round	256	4.237
NPC0001PT00004T00004	21.1	0	IV	NA	NA	N/A	269	6.378
NPC0001PT00078T00078	21.39	1	III	95	5	Mixed (round & spindle)	50	7.256
NPC0001PT00234T00234	23.1333	0	NA	20	20	Mixed (round & spindle)	33	2.257
NPC0001PT00349T00349	29.4333	0	II	80	2	Differentiated	287	7.58
NPC0001PT00289T00289	NA	NA	NA	60	10	Mixed (round & spindle)	24	8.282
NPC0001PT00370T00370	26.9	0	IV	10	5	Mixed (round & spindle)	31	4.891
NPC0001PT00029T00029	39.3	0	NA	90	10	Differentiated	NA	5.764
NPC0001PT00236T00236	NA	NA	NA	90	5	Mixed (round & spindle)	275	8.932
NPC0001PT00312T00312	6.01	1	III	10	5	Undifferentiated, round	30	10.476
NPC0001PT00061T00061	40.0667	0	IV	90	30	Differentiated	12	4.249
NPC0001PT00152T00152	37.9	0	NA	NA	NA	Mixed (round & spindle)	10	3.132
NPC0001PT00331T00331	NA	NA	NA	60	5	Undifferentiated, round	282	5.409
NPC0001PT00196T00196	34.5	0	III	90	5	Mixed (round & spindle)	232	1.817
NPC0001PT00100T00100	30.9667	0	NA	50	2	Differentiated	385	10.365
NPC0001PT00437T00437	22.1333	0	IV	10	5	Undifferentiated, spindle	22	4.056
NPC0001PT00048T00048	6.34	1	III	40	5	Undifferentiated, round	17	10.683
NPC0001PT00300T00300	26.8	0	III	20	10	Undifferentiated, round	241	3.956
NPC0001PT00344T00344	25.0667	0	NA	70	5	Undifferentiated, round	14	5.755
NPC0001PT00263T00263	36.4333	0	III	30	10	Mixed (round & spindle)	278	3.993
NPC0001PT00075T00075	29.0667	0	III	5	50	Mixed (round & spindle)	56	12.684
NPC0001PT00177T00177	8.41	1	III	20	5	Mixed (round & spindle)	285	8.955
NPC0001PT00012T00012	36	0	NA	90	10	Differentiated	17	9.969
NPC0002PT00016T00016	NA	NA	NA	60	5	Mixed (round & spindle)	NA	1.216
NPC0001PT00450T00450	9.26667	0	III	90	5	Undifferentiated, round	91	7.171
NPC0001PT00044T00044	42.4	0	III	70	15	Undifferentiated, spindle	NA	7.46
NPC0001PT00438T00438	14.6333	0	III	90	5	N/A	17	8.584
NPC0001PT00422T00422	28.7667	0	III	80	10	Mixed (round & spindle)	19	6.561
NPC0001PT00354T00354	17.5	0	NA	90	20	Undifferentiated, round	1013	3.851
NPC0001PT00096T00096	NA	NA	NA	40	10	Mixed (round & spindle)	41	4.707
NPC0002PT00019T00019	33.6667	0	IV	90	50	Undifferentiated, round	146	4.239
NPC0001PT00452T00452	12.9	0	IV	50	5	Mixed (round & spindle)	10	9.373
NPC0001PT00414T00414	12.4333	0	NA	90	10	Mixed (round & spindle)	238	3.823
NPC0001PT00046T00046	37.1	0	III	5	1	Mixed (round & spindle)	NA	8.369
NPC0001PT00099T00099	39.3667	0	III	20	20	Undifferentiated, round	37	2.938
NPC0002PT00036T00036	22.7667	0	IV	30	15	Mixed (round & spindle)	19	2.499
NPC0001PT00204T00204	11.3	1	IV	20	1	Undifferentiated, round	265	10.674
NPC0002PT00013T00013	14.29	1	IV	NA	NA	N/A	257	5.348
NPC0001PT00286T00286	20.1333	0	III	30	30	Mixed (round & spindle)	2	2.121
NPC0001PT00070T00070	33.3333	0	NA	60	10	Differentiated	13	5.743
NPC0001PT00209T00209	51.3333	0	III	10	5	Mixed (round & spindle)	248	5.189
NPC0001PT00396T00396	15.34	1	NA	5	10	Undifferentiated, round	21	4.6
NPC0001PT00294T00294	32.1667	0	III	50	30	Mixed (round & spindle)	13	3.859
NPC0002PT00034T00034	21.2667	0	III	90	10	Mixed (round & spindle)	15	3.119
NPC0001PT00079T00079	8.51	1	III	30	10	Undifferentiated, spindle	18	5.39
NPC0002PT00038T00038	27.2667	0	II	NA	NA	N/A	239	2.831
NPC0001PT00302T00302	NA	NA	NA	20	5	Undifferentiated, round	68	9.683
NPC0001PT00240T00240	36.6	0	NA	80	10	Mixed (round & spindle)	255	3.785
NPC0001PT00233T00233	16	0	NA	95	5	Undifferentiated, spindle	17	3.954
NPC0001PT00055T00055	32.46	1	IV	70	5	Undifferentiated, spindle	52	7.188
NPC0002PT00037T00037	18.4	0	III	90	2	Differentiated	275	7.583
NPC0001PT00445T00445	12.8667	0	IV	30	10	Mixed (round & spindle)	41	6.31
NPC0001PT00065T00065	30.9667	0	IV	10	40	Undifferentiated, round	20	2.507
NPC0001PT00226T00226	29.2667	0	III	40	30	Mixed (round & spindle)	277	2.801
NPC0001PT00192T00192	NA	NA	NA	40	10	Undifferentiated, round	293	3.676
NPC0001PT00278T00278	37.1333	0	IV	90	20	N/A	260	8.415
NPC0001PT00020T00020	39.5	0	III	90	20	Undifferentiated, spindle	36	4.455
NPC0001PT00235T00235	23.0667	0	NA	20	10	Undifferentiated, round	181	6.284
NPC0001PT00392T00392	19.6333	0	III	80	5	Mixed (round & spindle)	32	7.188
NPC0001PT00389T00389	19.7667	0	I	80	10	Mixed (round & spindle)	264	4.372
NPC0001PT00243T00243	NA	NA	NA	90	5	Mixed (round & spindle)	258	2.353
NPC0002PT00015T00015	NA	NA	NA	NA	NA	Not evaluated	NA	9.065
NPC0001PT00054T00054	17.2333	0	III	35	5	Undifferentiated, spindle	16	6.429
NPC0001PT00388T00388	12.1	0	III	95	5	Undifferentiated, round	14	5.296
NPC0001PT00258T00258	35.6667	0	III	50	5	Mixed (round & spindle)	255	7.357
NPC0001PT00332T00332	26.6	0	NA	20	5	Mixed (round & spindle)	301	5.194
NPC0001PT00306T00306	NA	NA	NA	30	5	Mixed (round & spindle)	27	3.829
NPC0001PT00229T00229	NA	NA	III	90	5	Undifferentiated, round	285	4.036
NPC0001PT00290T00290	NA	NA	NA	95	5	Mixed (round & spindle)	252	4.509
NPC0001PT00329T00329	NA	NA	NA	20	10	Mixed (round & spindle)	261	3.281
NPC0002PT00018T00018	28.5667	0	I	80	5	N/A	265	4.011
NPC0001PT00391T00391	26.7667	0	NA	85	5	Undifferentiated, round	98	7.77
NPC0001PT00341T00341	14.23	1	IV	40	5	Differentiated	23	7.935
NPC0001PT00097T00097	NA	NA	NA	55	5	Undifferentiated, round	40	6.678
NPC0001PT00005T00005	55.2333	0	III	NA	NA	N/A	312	2.61
NPC0001PT00207T00207	37.7333	0	III	70	5	Undifferentiated, round	271	3.551
NPC0001PT00355T00355	32.8333	0	III	60	10	Mixed (round & spindle)	296	7.726
NPC0002PT00041T00041	3.19	1	III	NA	NA	N/A	266	3.031
NPC0001PT00406T00406	30.9	0	I	70	10	Undifferentiated, round	17	3.423
NPC0001PT00383T00383	7.1	0	NA	50	20	Undifferentiated, round	244	1.934
NPC0001PT00144T00144	NA	NA	NA	60	30	Undifferentiated, spindle	18	2.595
NPC0001PT00338T00338	NA	NA	IV	50	5	Undifferentiated, round	227	0.964
NPC0001PT00014T00014	13.9333	0	IV	60	10	Mixed (round & spindle)	31	9.36
NPC0001PT00173T00173	41.8	0	III	30	10	Mixed (round & spindle)	266	5.857
NPC0001PT00322T00322	NA	NA	NA	5	5	Mixed (round & spindle)	246	1.77
NPC0001PT00407T00407	26.0667	0	I	90	5	Undifferentiated, round	245	3.685
NPC0001PT00320T00320	NA	NA	NA	5	10	Undifferentiated, spindle	268	3.418
NPC0001PT00305T00305	NA	NA	NA	20	40	Undifferentiated, round	292	4.226
NPC0001PT00071T00071	5	0	III	10	20	Mixed (round & spindle)	15	8.518
NPC0001PT00439T00439	13.4	0	NA	30	30	Undifferentiated, round	22	2.969
NPC0001PT00237T00237	36.9	0	NA	70	5	Undifferentiated, round	257	5.181
NPC0001PT00293T00293	NA	NA	NA	20	5	Undifferentiated, spindle	258	12.246
NPC0001PT00151T00151	15.28	1	NA	10	40	Undifferentiated, round	18	6.107
NPC0001PT00260T00260	14.29	1	IV	20	15	Mixed (round & spindle)	39	7.86
NPC0001PT00069T00069	25.82	1	IV	90	20	Differentiated	20	4.957
NPC0002PT00040T00040	22.9	0	IV	NA	NA	N/A	256	2.356
NPC0001PT00443T00443	21.5333	0	III	0	40	Undifferentiated, round	270	2.262
NPC0001PT00298T00298	29.7667	0	III	40	20	Undifferentiated, round	70	5.02
NPC0001PT00056T00056	13.83	1	IV	30	10	Undifferentiated, round	14	6.655
NPC0001PT00337T00337	NA	NA	NA	40	20	N/A	25	5.191
NPC0001PT00421T00421	NA	NA	IV	10	5	Undifferentiated, spindle	NA	5.179
NPC0001PT00426T00426	26.8	0	IV	90	20	Mixed (round & spindle)	257	4.21
NPC0001PT00296T00296	20.7333	0	III	55	5	Undifferentiated, spindle	313	5.278
NPC0001PT00346T00346	17.5667	0	IV	90	1	Differentiated	266	15.002
NPC0001PT00178T00178	NA	NA	IV	10	5	Undifferentiated, round	268	2.833
NPC0001PT00027T00027	16.7667	0	IV	50	5	Undifferentiated, round	NA	11.18
NPC0001PT00336T00336	19.3333	0	III	70	5	Undifferentiated, round	7	3.98
NPC0001PT00001T00001	NA	NA	III	NA	NA	N/A	NA	1.953
NPC0001PT00357T00357	24.9333	0	III	20	40	Undifferentiated, round	251	3.401
NPC0001PT00369T00369	28	0	III	10	1	Mixed (round & spindle)	24	3.282
NPC0001PT00431T00431	NA	NA	NA	10	20	Undifferentiated, spindle	15	1.953
NPC0002PT00039T00039	12.3	0	I	NA	NA	N/A	262	0.982
NPC0001PT00221T00221	7.49	1	III	30	5	Mixed (round & spindle)	248	9.001
