# Supplementary material for: Multi-omics analysis reveals the association between elevated KIF18B expression and unfavorable prognosis, immune evasion, and regulatory T cell activation in nasopharyngeal carcinoma
Source: Front Immunol. 2023 Sep 8;14:1258344. doi: 10.3389/fimmu.2023.1258344 (PMC10514916; doi:10.3389/fimmu.2023.1258344)
Supplement: Supplementary file 5 [file Table_4.xlsx]

## Sheet: Sheet1
Supplementary Materials for Tables
Multi-omics analysis reveals the association between elevated KIF18B expression and unfavorable prognosis, immune evasion, and regulatory T cell activation in nasopharyngeal carcinoma
Supplementary Table S4. Baseline information of our institutional cohort
ID	Group	IHC_score
N1	Normal	0
N2	Normal	2
N3	Normal	3
N4	Normal	1
N5	Normal	2
N6	Normal	3
N7	Normal	3
N8	Normal	0
N9	Normal	3
N10	Normal	2
N11	Normal	2
N12	Normal	0
N13	Normal	2
N14	Normal	2
N15	Normal	0
N16	Normal	3
T1	Tumor	9
T2	Tumor	8
T3	Tumor	2
T4	Tumor	12
T5	Tumor	12
T6	Tumor	6
T7	Tumor	6
T8	Tumor	9
T9	Tumor	12
T10	Tumor	6
T11	Tumor	8
T12	Tumor	9
T13	Tumor	3
T14	Tumor	12
T15	Tumor	6
T16	Tumor	6
T17	Tumor	6
T18	Tumor	12
T19	Tumor	6
T20	Tumor	9
T21	Tumor	4
T22	Tumor	12
T23	Tumor	2
T24	Tumor	2
T25	Tumor	12
T26	Tumor	12
T27	Tumor	6
T28	Tumor	9
T29	Tumor	6
