# Supplementary material for: Multi-omics analysis reveals the association between elevated KIF18B expression and unfavorable prognosis, immune evasion, and regulatory T cell activation in nasopharyngeal carcinoma
Source: Front Immunol. 2023 Sep 8;14:1258344. doi: 10.3389/fimmu.2023.1258344 (PMC10514916; doi:10.3389/fimmu.2023.1258344)
Supplement: Supplementary file 6 [file Table_5.xlsx]

## Sheet: Sheet3
Supplementary Materials for Tables
Multi-omics analysis reveals the association between elevated KIF18B expression and unfavorable prognosis, immune evasion, and regulatory T cell activation in nasopharyngeal carcinoma
Supplementary Table S5. Baseline information of tissue microarry
ID	Gender	Age	Histological type	T	N	M	Stage	IHC_score_average	OS	OStime(months)	RFS	RFStime(months)	DMFS	DMFStime(months)	PFS	PFStime(months)
A01	Male	57	III	2	2	0	3	2.5	0	85	0	85	0	85	0	85
A02	Male	50	III	2	0	0	2	6	0	85	0	85	0	85	0	85
A03	Male	52	III	1	0	0	1	3	0	85	0	85	0	85	0	85
A04	Male	61	I-II	2	1	0	2	6	0	84	0	84	0	84	0	84
A05	Male	54	I-II	1	0	0	1	4.5	0	84	0	84	0	84	0	84
A06	Male	37	III	2	0	0	2	NA	0	84	0	84	0	84	0	84
A07	Male	63	III	3	3	0	4A	7.5	0	84	1	54	1	75	1	54
A08	Male	38	III	2	1	0	2	2	0	84	0	84	0	84	0	84
A09	Male	43	III	4	1	0	4A	NA	1	67	1	14	1	53	1	14
A10	Male	50	III	3	3	0	4A	6	0	83	1	75	1	75	1	75
A11	Male	42	III	1	0	0	1	3	0	83	0	83	0	83	0	83
A12	Female	39	III	2	1	0	2	2	0	83	0	83	0	83	0	83
A13	Female	57	III	3	2	0	3	6	1	49	0	49	0	49	1	49
A14	Female	54	III	1	0	0	1	3	0	83	0	83	0	83	0	83
B01	Male	39	I-II	3	1	0	3	3	0	83	0	83	0	83	0	83
B02	Male	61	III	2	0	0	2	9	1	54	1	44	0	54	1	44
B03	Male	62	III	1	0	0	1	2	0	83	0	83	0	83	0	83
B04	Female	44	III	3	1	0	3	7.5	0	83	0	83	0	83	0	83
B05	Male	57	III	4	2	0	4A	9	1	78	1	55	0	78	1	55
B06	Female	40	I-II	2	1	0	2	6	0	82	0	82	0	82	0	82
B07	Male	47	III	4	2	0	4A	9	1	54	1	52	1	52	1	52
B08	Male	39	III	2	2	0	3	3	0	82	0	82	0	82	0	82
B09	Male	36	III	1	0	0	1	2	0	82	0	82	0	82	0	82
B10	Male	41	III	2	1	0	2	4.5	0	82	0	82	0	82	0	82
B11	Female	37	I-II	3	1	0	3	1	0	81	0	81	0	81	0	81
B12	Male	54	III	2	0	0	2	3	0	81	0	81	0	81	0	81
B13	Male	58	I-II	4	2	0	4A	3	1	59	1	50	1	50	1	50
B14	Male	45	III	3	2	0	3	2.5	1	77	1	53	0	77	1	53
C01	Female	28	III	2	2	0	3	5	0	81	0	81	0	81	0	81
C02	Male	42	III	2	1	0	2	6	0	80	0	80	0	80	0	80
C03	Male	47	III	4	2	1	4B	6	1	48	1	43	0	48	1	43
C04	Male	50	I-II	2	0	0	2	3	0	80	0	80	0	80	0	80
C05	Male	23	III	3	3	0	4A	5	1	64	1	32	1	32	1	32
C06	Male	56	III	3	1	0	3	10.5	0	80	0	80	0	80	0	80
C07	Male	66	III	2	1	0	2	2.5	0	80	0	80	0	80	0	80
C08	Male	41	III	2	0	0	2	7.5	0	80	1	38	0	80	1	38
C09	Male	68	III	3	1	0	3	2	0	80	0	80	0	80	0	80
C10	Male	54	I-II	2	1	0	2	4.5	0	80	0	80	0	80	0	80
C11	Male	57	III	3	3	0	4A	5	1	73	1	18	1	48	1	18
C12	Female	54	III	1	0	0	1	3	0	80	0	80	0	80	0	80
C13	Male	54	III	2	2	0	3	4	0	80	0	80	0	80	0	80
C14	Male	57	III	2	2	0	3	3.5	0	79	1	49	0	79	1	49
D01	Male	52	III	3	2	0	3	4.5	0	79	0	79	0	79	0	79
D02	Female	23	III	2	1	0	2	7.5	0	79	0	79	0	79	0	79
D03	Male	27	III	3	1	0	3	6	0	79	0	79	0	79	0	79
D04	Female	60	I-II	2	1	0	2	7.5	0	79	0	79	0	79	0	79
D05	Female	42	III	1	0	0	1	4	0	78	0	78	0	78	0	78
D06	Female	47	III	4	2	0	4A	7.5	1	53	1	43	0	53	1	43
D07	Female	36	III	2	1	0	2	3	0	73	0	73	0	73	0	73
D08	Male	68	III	3	1	0	3	6	0	72	0	72	0	72	0	72
D09	Male	38	III	4	2	0	4A	6	1	65	1	48	0	65	1	48
D10	Male	34	III	3	2	0	3	6	0	72	1	59	0	72	1	59
D11	Male	73	III	2	1	0	2	2.5	0	72	1	26	0	72	1	26
D12	Male	42	I-II	1	0	0	1	NA	0	72	0	72	0	72	0	72
D13	Male	47	III	2	1	0	2	3	0	72	0	72	0	72	0	72
D14	Male	47	III	3	2	0	3	1.5	0	72	1	37	0	72	1	37
E01	Male	41	III	3	1	0	3	4.5	0	71	0	71	0	71	0	71
E02	Female	53	III	1	0	0	1	6	0	71	0	71	0	71	0	71
E03	Male	42	III	3	2	0	3	7.5	0	71	1	50	0	71	1	50
E04	Female	47	III	2	1	0	2	7.5	0	71	0	71	0	71	0	71
E05	Male	65	III	3	2	0	3	7.5	0	71	1	29	0	71	1	29
E06	Female	43	III	3	2	0	3	6	0	71	1	51	0	71	1	51
E07	Male	39	III	3	1	0	3	3	0	70	0	70	0	70	0	70
E08	Male	47	III	1	0	0	1	1.5	0	70	0	70	0	70	0	70
E09	Male	58	III	4	1	0	4A	NA	1	43	1	12	1	38	1	12
E10	Male	56	III	2	2	0	3	4	0	70	1	33	0	70	1	33
E11	Male	66	III	2	0	0	2	4.5	0	69	1	43	0	69	1	43
E12	Male	43	III	3	2	0	3	3	0	69	1	56	0	69	1	56
E13	Female	58	III	2	1	0	2	6	0	69	1	37	0	69	1	37
E14	Male	48	III	2	3	0	4A	6	1	53	1	41	0	53	1	41
F01	Female	31	III	2	0	0	2	3	0	69	0	69	0	69	0	69
F02	Male	53	III	3	2	0	3	2.5	0	69	1	38	0	69	1	38
F03	Male	48	III	2	1	0	2	10.5	0	69	1	29	0	69	1	29
F04	Male	32	III	2	0	0	2	6	0	68	1	45	0	68	1	45
F05	Male	56	III	2	1	0	2	7.5	0	68	0	68	0	68	0	68
F06	Male	48	III	2	1	0	2	9	0	68	0	68	0	68	0	68
F07	Male	56	III	2	2	0	3	7.5	0	68	1	28	0	68	1	28
F08	Male	51	III	2	0	0	2	6	0	68	0	68	0	68	0	68
F09	Male	45	III	3	2	0	3	9	0	68	1	43	0	68	1	43
F10	Male	38	III	1	0	0	1	1.5	0	68	0	68	0	68	0	68
F11	Male	39	III	2	0	0	2	4.5	0	68	1	24	0	68	1	24
F12	Female	49	III	3	2	0	3	5	0	68	1	35	0	68	1	35
F13	Male	42	III	2	0	0	2	2.5	0	68	1	44	0	68	1	44
F14	Female	54	III	2	0	0	2	9	0	68	1	29	0	68	1	29
G01	Female	29	I-II	1	0	0	1	3	0	67	0	67	0	67	0	67
G02	Male	61	III	2	0	0	2	6	0	67	1	49	0	67	1	49
G03	Male	34	III	2	1	0	2	3	0	67	1	28	0	67	1	28
G04	Male	56	III	2	2	0	3	5	0	67	1	34	0	67	1	34
G05	Male	37	III	2	1	0	2	2.5	0	67	1	32	0	67	1	32
G06	Male	58	III	2	1	0	2	3	0	67	1	28	0	67	1	28
G07	Female	38	III	4	2	0	4A	2	1	34	1	27	0	34	1	27
G08	Female	61	I-II	2	1	0	2	1.5	0	66	0	66	0	66	0	66
G09	Female	40	III	3	1	0	3	1.5	0	66	0	66	0	66	0	66
G10	Male	43	III	4	1	0	4A	3	1	58	1	30	1	30	1	30
G11	Female	43	I-II	2	0	0	2	2	0	66	0	66	0	66	0	66
G12	Male	42	III	1	2	0	3	4	0	66	1	48	0	66	1	48
G13	Male	47	III	2	2	0	3	6.5	0	66	1	28	0	66	1	28
G14	Male	43	III	4	2	0	4A	6	1	62	1	34	1	34	1	34
H01	Male	63	III	1	0	0	1	4.5	0	66	0	66	0	66	0	66
H02	Male	54	III	2	1	0	2	3	0	66	0	66	0	66	0	66
H03	Female	55	III	2	1	0	2	3	0	65	0	65	0	65	0	65
H04	Female	20	III	4	1	0	4A	9	1	62	1	41	1	41	1	41
H05	Male	46	III	2	1	0	2	1.5	0	65	0	65	0	65	0	65
H06	Male	50	I-II	3	0	0	3	7.5	0	65	1	42	0	65	1	42
H07	Male	82	III	2	1	0	2	6	0	65	0	65	0	65	0	65
H08	Male	47	III	2	1	0	2	3.5	0	65	0	65	0	65	0	65
H09	Female	30	III	3	1	0	3	3	0	65	0	65	0	65	0	65
H10	Male	65	III	3	1	0	3	1.5	0	65	0	65	0	65	0	65
H11	Female	48	III	4	1	0	4A	6	0	64	1	30	0	64	1	30
H12	Female	41	III	2	0	0	2	5	0	64	1	43	0	64	1	43
